# Supplementary material
Source: MDPI journal article supplement (https://www.mdpi.com/2073-4441/13/19/2733)
Supplement: s1 [file s1]

## Supplementary Material

### Release of Antibiotic-Resistance Genes from Hospitals and a Wastewater Treatment Plant in the Kathmandu Valley, Nepal

Ocean Thakali <sup>1</sup>, Bikash Malla <sup>2</sup>, Sarmila Tandukar <sup>2</sup>, Niva Sthapit <sup>1</sup>, Sunayana Raya <sup>1,3</sup>, Takashi Furukawa <sup>4</sup>, Kazunari Sei <sup>4</sup>, Jeevan B. Sherchand <sup>3</sup>, Eiji Haramoto <sup>2,\*</sup>

<sup>1</sup>Department of Engineering, University of Yamanashi, 4-3-11 Takeda, Kofu, Yamanashi 400-8511, Japan; othakali@gmail.com, niva1180@gmail.com, sunayana.raya@gmail.com

<sup>2</sup>Interdisciplinary Center for River Basin Environment, University of Yamanashi, 4-3-11 Takeda, Kofu, Yamanashi 400-8511, Japan; mallabikash@hotmail.com, sar1234tan@gmail.com, eharamoto@yamanashi.ac.jp

<sup>3</sup>Department of Microbiology, Institute of Medicine, Tribhuvan University, Kathmandu, Nepal; jeevanbsherchand@gmail.com

<sup>4</sup>Department of Health Science, Kitasato University, 1-15-1 Kitasato, Minami-ku, Sagamihara, Kanagawa 252-0373, Japan; tfuruka@kitasato-u.ac.jp, ksei@kitasato-u.ac.jp

\*Correspondence: eharamoto@yamanashi.ac.jp; Tel.: +81-55-220-8725

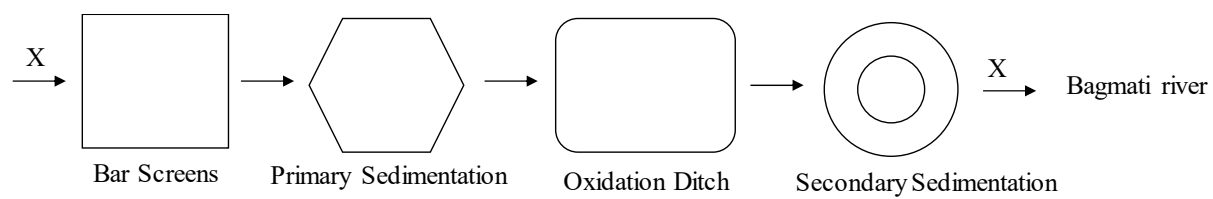

Figure S1. Schematic diagram of WWTP.

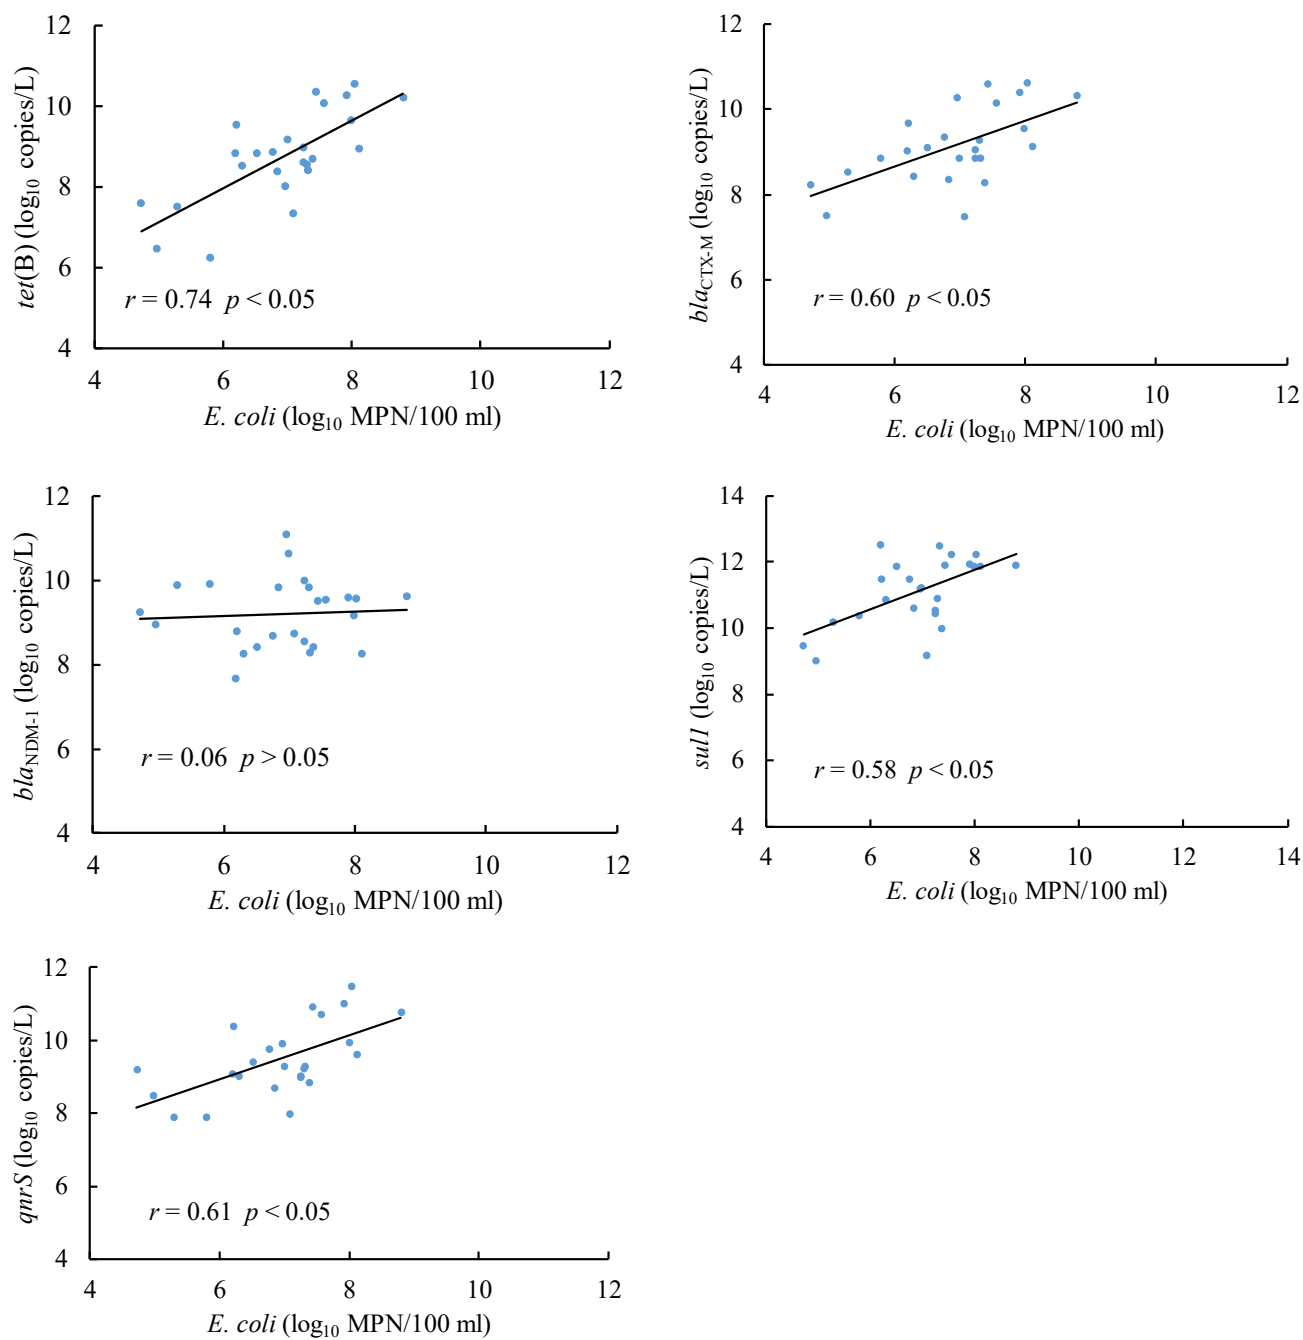

Figure S2. Correlation of *E. coli* with ARGs.

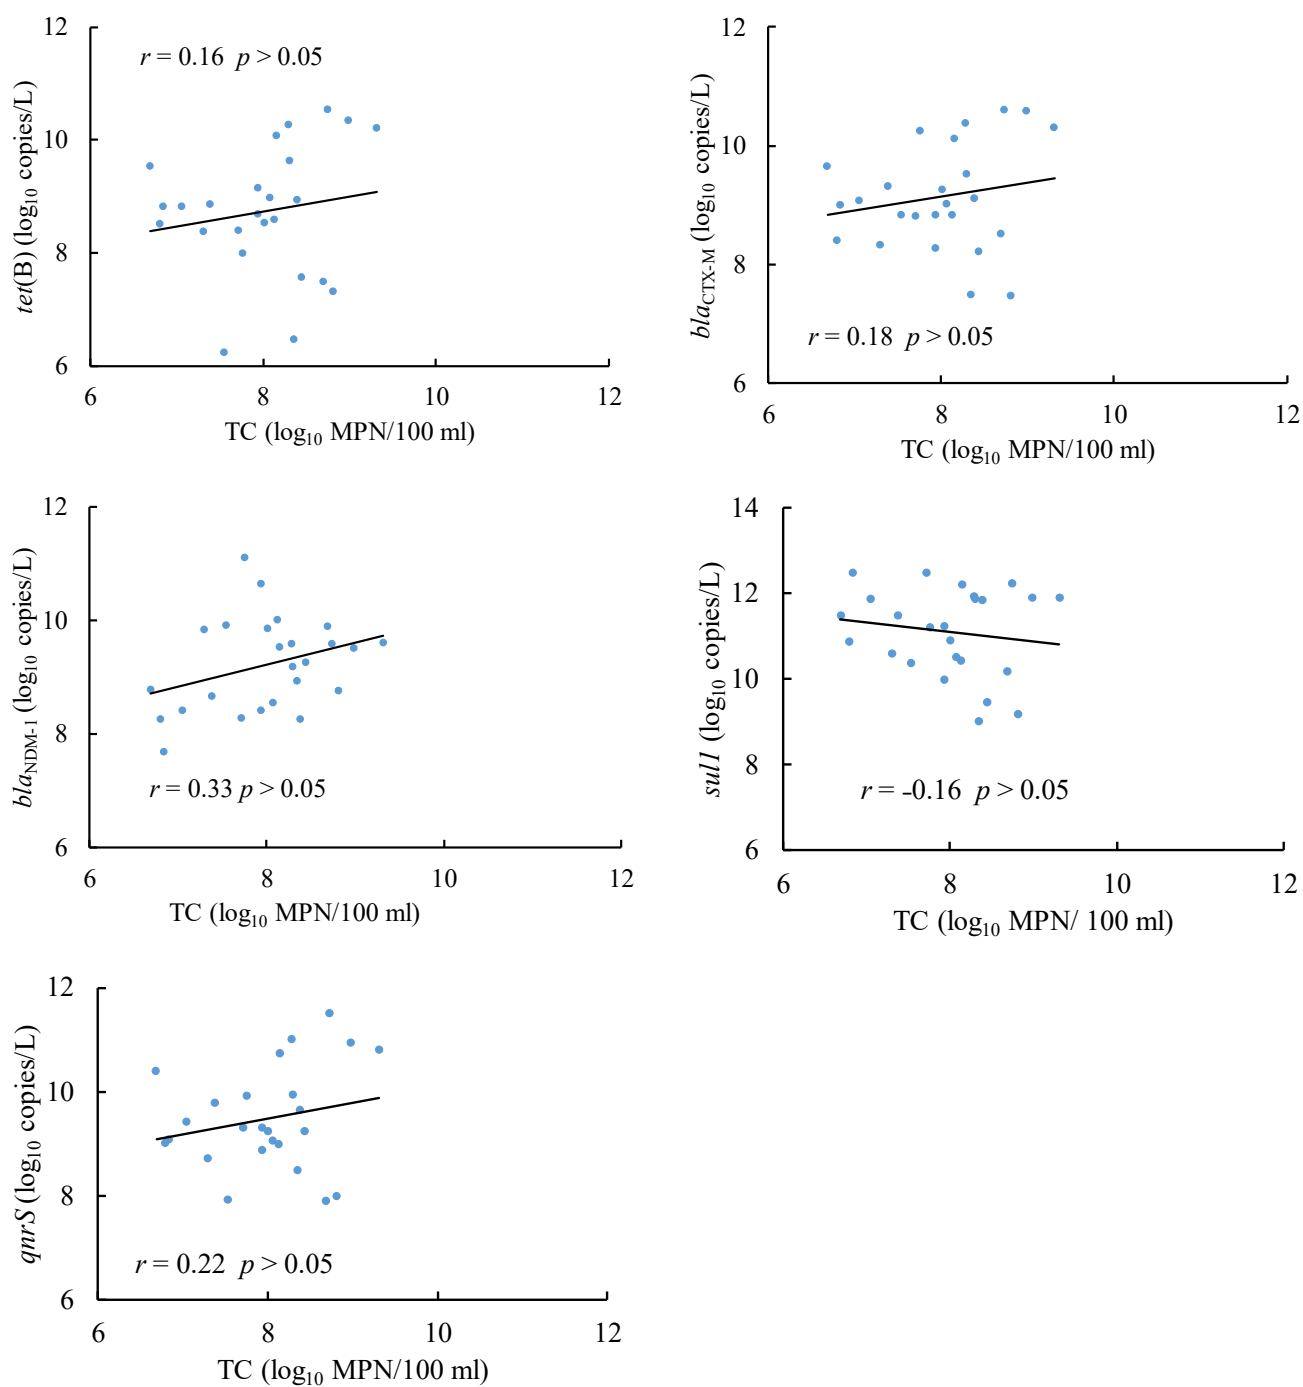

Figure S3. Correlation of TC with ARGs.

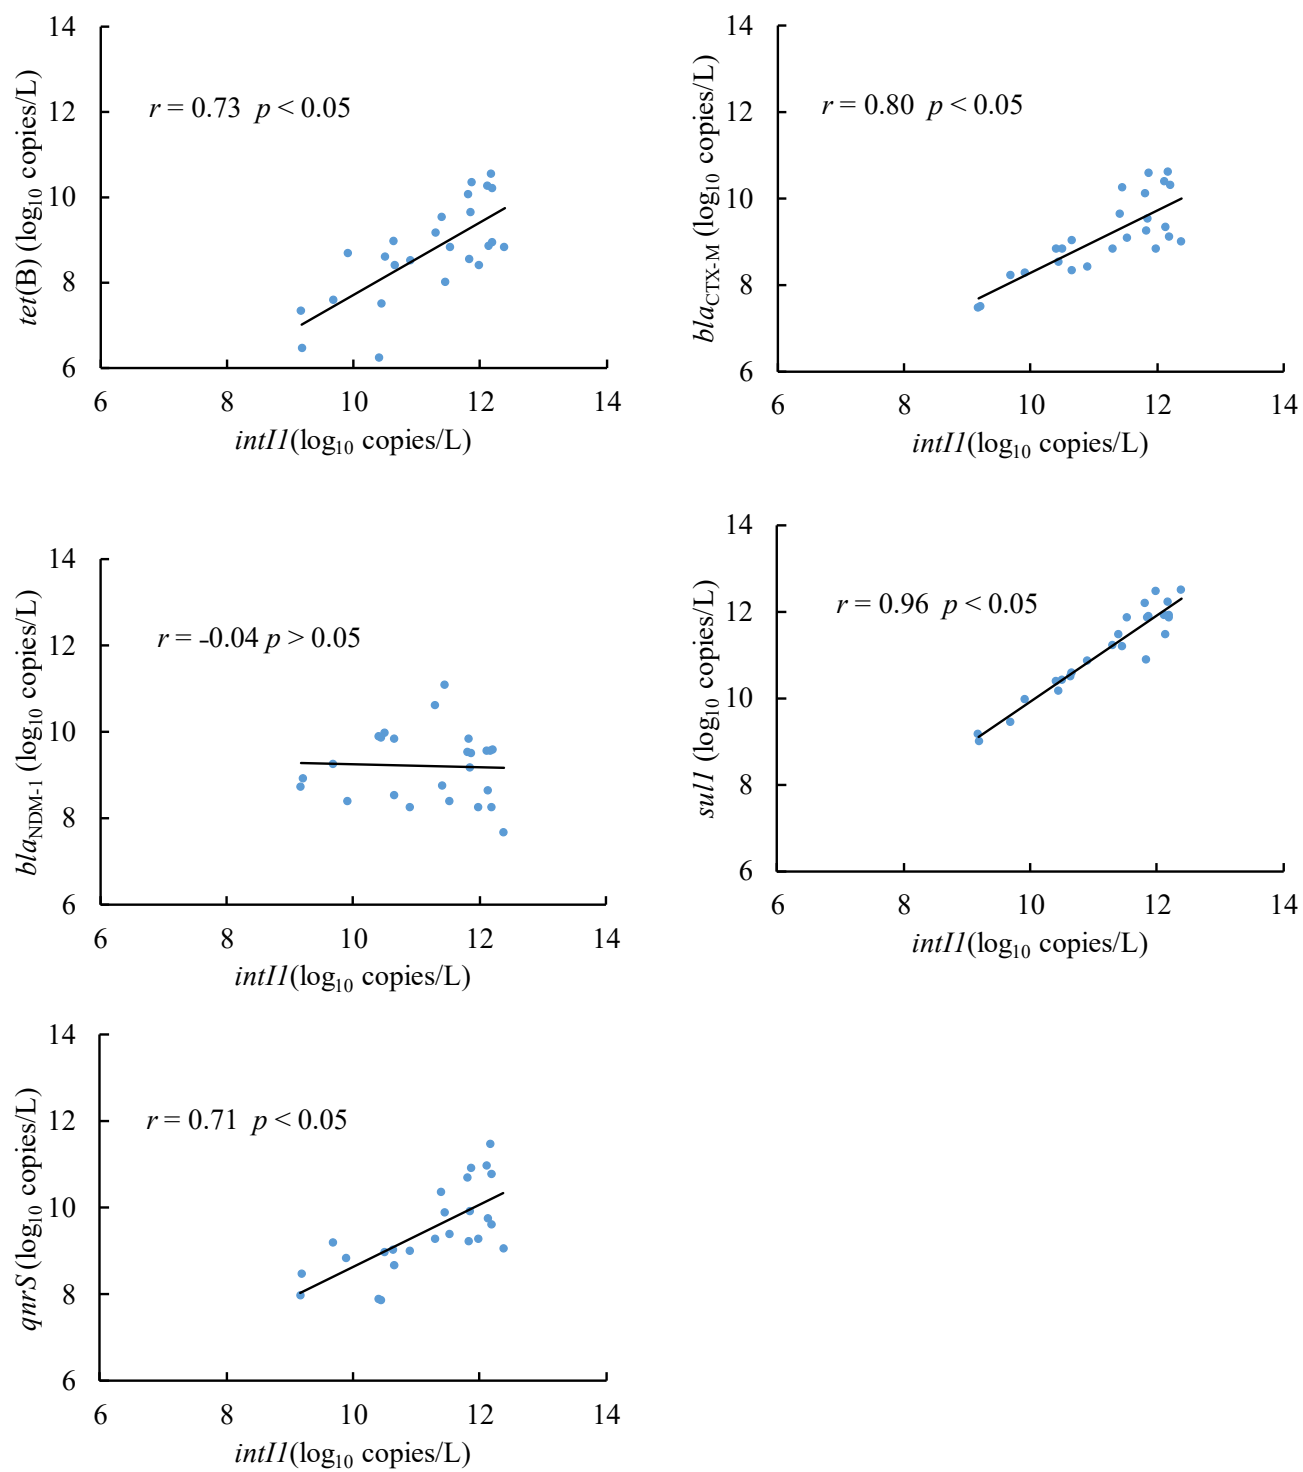

Figure S4. Correlation of *intII* with ARGs.
